# Supplementary material for: Luminescent zero-dimensional organic metal halide hybrids with near-unity quantum efficiency
Source: Royal Society of Chemistry journal article supplement (doi:10.1039/c7sc04539e), 2017-11-21
Supplement: c7sc04539e1.pdf [file c7sc04539e1.pdf]

## Supporting Information

### **Luminescent Zero-Dimensional Organic Metal Halide Hybrids with Near-Unity Quantum Efficiency**

Chenkun Zhou<sup>a</sup>, Haoran Lin<sup>a</sup>, Yu Tian<sup>b</sup>, Zhao Yuan<sup>a</sup>, Ronald Clark<sup>b</sup>, Banghao Chen<sup>b</sup>, Lambertus J. van de Burgt<sup>b</sup>, Jamie C. Wang<sup>b</sup>, Yan Zhou<sup>b</sup>, Kenneth Hanson<sup>bc</sup>, Quinton J. Meisner<sup>b</sup>, Jennifer Neu<sup>d</sup>, Tiglet Besara<sup>d</sup>, Theo Siegrist<sup>abd</sup>, Eric Lambers<sup>e</sup>, Peter Djurovich<sup>f</sup>, Biwu Ma<sup>abc\*</sup>

- a. Department of Chemical and Biological Engineering, FAMU-FSU College of Engineering, Tallahassee, FL 32310, USA.*
- b. Materials Science and Engineering Program, Florida State University, Tallahassee, FL 32306, USA.*
- c. Department of Chemistry and Biochemistry, Florida State University, Tallahassee, FL 32306, USA.*
- d. National High Magnetic Field Laboratory, Florida State University, Tallahassee, FL 32310, USA.*
- e. Research Service Centers, University of Florida, Gainesville, Florida 32661, USA.*
- f. Department of Chemistry, University of Southern California, Los Angeles, California 90089, USA.*

**Table S1** | Single crystal x-ray diffraction data and collection parameters. The collection was performed at a temperature of  $\sim 120$  K.

| Compound                                       | (C <sub>4</sub> N <sub>2</sub> H <sub>14</sub> Br) <sub>4</sub> SnBr <sub>6</sub>                                | (C <sub>4</sub> N <sub>2</sub> H <sub>14</sub> I) <sub>4</sub> SnI <sub>6</sub>                                 | (C <sub>9</sub> NH <sub>20</sub> ) <sub>2</sub> SbCl <sub>5</sub> |
|------------------------------------------------|------------------------------------------------------------------------------------------------------------------|-----------------------------------------------------------------------------------------------------------------|-------------------------------------------------------------------|
| Formula                                        | [(CH <sub>3</sub> NH <sub>2</sub> ) <sub>2</sub> C <sub>2</sub> H <sub>4</sub> ] <sub>4</sub> SnBr <sub>10</sub> | [(CH <sub>3</sub> NH <sub>2</sub> ) <sub>2</sub> C <sub>2</sub> H <sub>4</sub> ] <sub>4</sub> SnI <sub>10</sub> | C <sub>18</sub> H <sub>40</sub> Cl <sub>5</sub> N <sub>2</sub> Sb |
| Molecular weight                               | 1278.40 g/mol                                                                                                    | 1748.37 g/mol                                                                                                   | 583.54 g/mol                                                      |
| Space group                                    | <i>P</i> -1 (# 2)                                                                                                | <i>P</i> -1                                                                                                     | <i>P</i> 2 <sub>1</sub> / <i>n</i>                                |
| <i>a</i>                                       | 10.2070(4) Å                                                                                                     | 10.7464(7) Å                                                                                                    | 8.7562(2) Å                                                       |
| <i>b</i>                                       | 10.6944(4) Å                                                                                                     | 10.8924(7) Å                                                                                                    | 27.2439(5) Å                                                      |
| <i>c</i>                                       | 18.5996(6) Å                                                                                                     | 11.1796(7) Å                                                                                                    | 10.64230(2) Å                                                     |
| $\alpha$                                       | 94.043(3)°                                                                                                       | 64.2658(7)°                                                                                                     | 90.0000°                                                          |
| $\beta$                                        | 102.847(3)°                                                                                                      | 80.1825(7)°                                                                                                     | 97.354(2)°                                                        |
| $\gamma$                                       | 97.904(3)°                                                                                                       | 72.8331(7)°                                                                                                     | 90.0000°                                                          |
| <i>V</i>                                       | 1949.89(12) Å <sup>3</sup>                                                                                       | 1124.94(12) Å <sup>3</sup>                                                                                      | 2518.02(8) Å <sup>3</sup>                                         |
| <i>Z</i>                                       | 2                                                                                                                | 1                                                                                                               | 4                                                                 |
| $\rho_{\text{calc.}}$                          | 2.177 g/cm <sup>3</sup>                                                                                          | 2.581 g/cm <sup>3</sup>                                                                                         | 1.539 g/cm <sup>3</sup>                                           |
| $\mu$                                          | 10.922 mm <sup>-1</sup>                                                                                          | 7.448 mm <sup>-1</sup>                                                                                          | 1.633 mm <sup>-1</sup>                                            |
| Data collection range                          | 2.815° < $\theta$ < 34.220°                                                                                      | 1.986° < $\theta$ < 29.408°                                                                                     | 2.782° < $\theta$ < 31.981°                                       |
| Reflections collected                          | 57392                                                                                                            | 14019                                                                                                           | 32635                                                             |
| Independent reflections                        | 11532                                                                                                            | 5710                                                                                                            | 8177                                                              |
| Parameters refined                             | 540                                                                                                              | 165                                                                                                             | 395                                                               |
| Restraints                                     | 240                                                                                                              | 0                                                                                                               | 174                                                               |
| <i>R</i> <sub>1</sub> , <i>wR</i> <sub>2</sub> | 0.0651 <sup>a</sup> , 0.0511 <sup>b</sup>                                                                        | 0.0178, 0.0349                                                                                                  | 0.0418, 0.0542                                                    |
| Goodness-of-fit on <i>F</i> <sup>2</sup>       | 0.9933                                                                                                           | 1.078                                                                                                           | 0.9984                                                            |

<sup>a)</sup>  $R_1 = \sum \|F_o\| - \|F_c\| / \sum \|F_o\|$ . <sup>b)</sup>  $wR_2 = [\sum w(F_o^2 - F_c^2)^2 / \sum w(F_o^2)^2]^{1/2}$ .

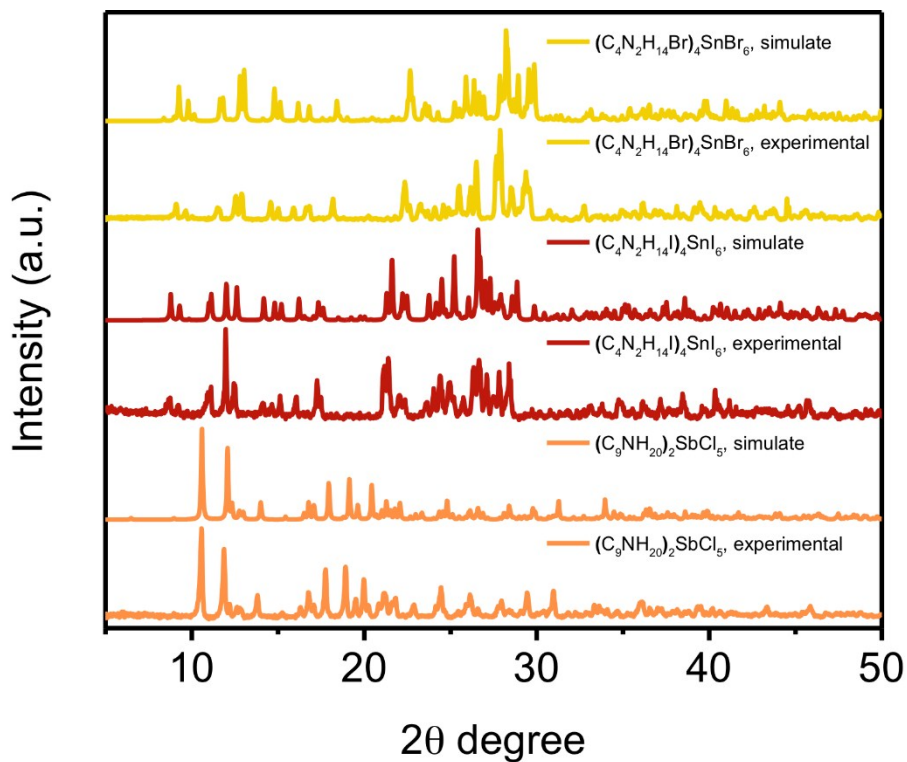

**Figure S1.** PXRD of powder 0D organic metal halide hybrids as well as their simulated results.

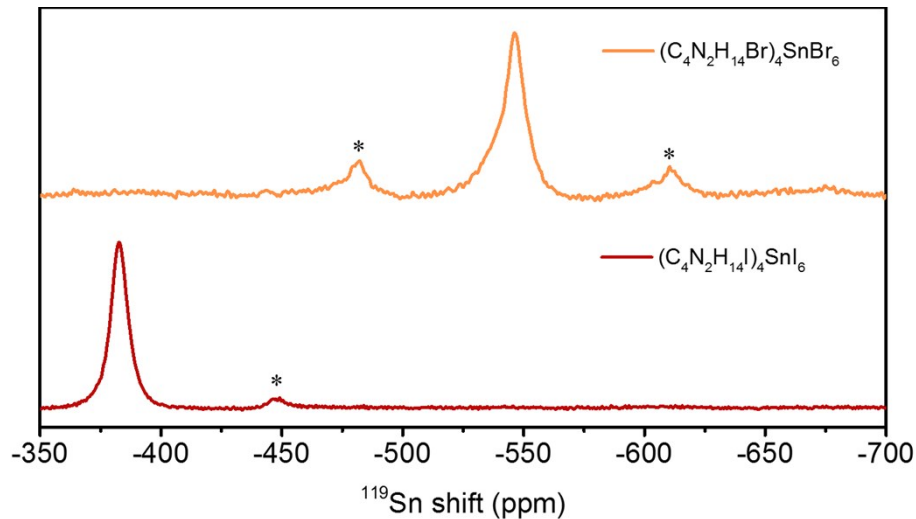

**Figure S2.**  $^{119}\text{Sn}$  MAS NMR spectra of 0D organic tin halide hybrids recorded at room temperature spinning at 12 kHz. Spinning sidebands are indicated with asterisks.

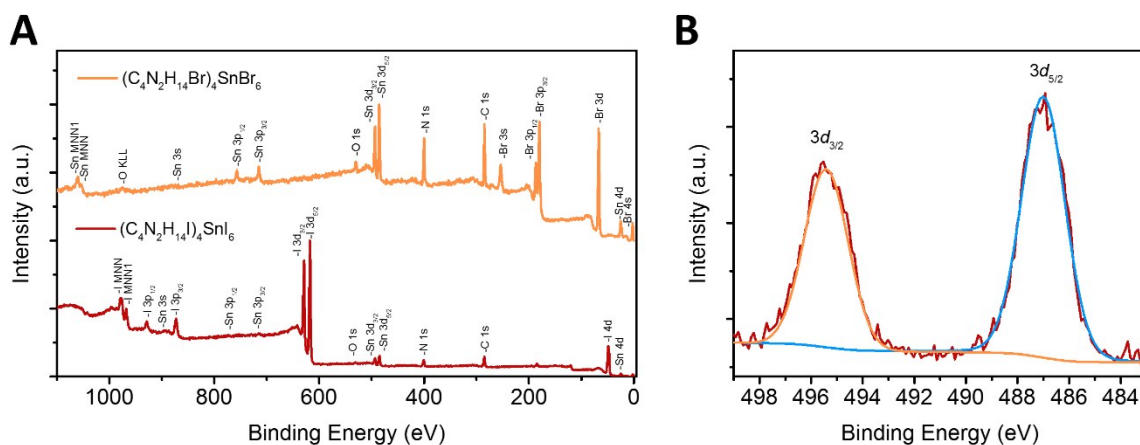

**Figure S3.** X-ray photoelectron spectroscopy (XPS) of 0D organic tin halide hybrids: (a) survey spectra of two 0D organic tin halide hybrids, and (b) high resolution Sn spectra in  $(C_4N_2H_{14}Br)_4SnBr_6$ .

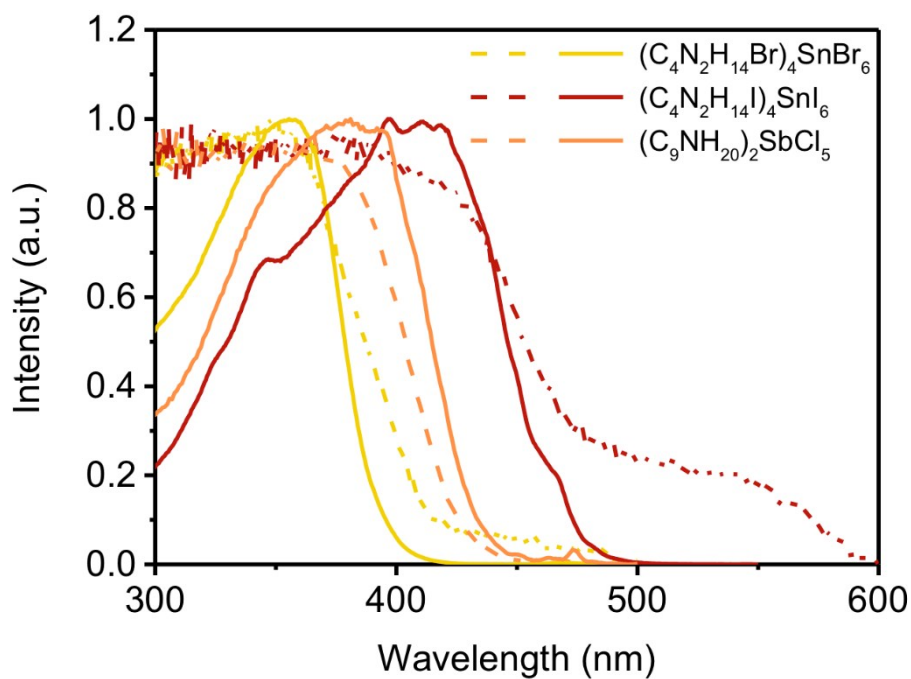

**Figure S4.** Absorption (dash line) and excitation (solid line) spectra of 0D organic metal halide hybrids recorded at room temperature.

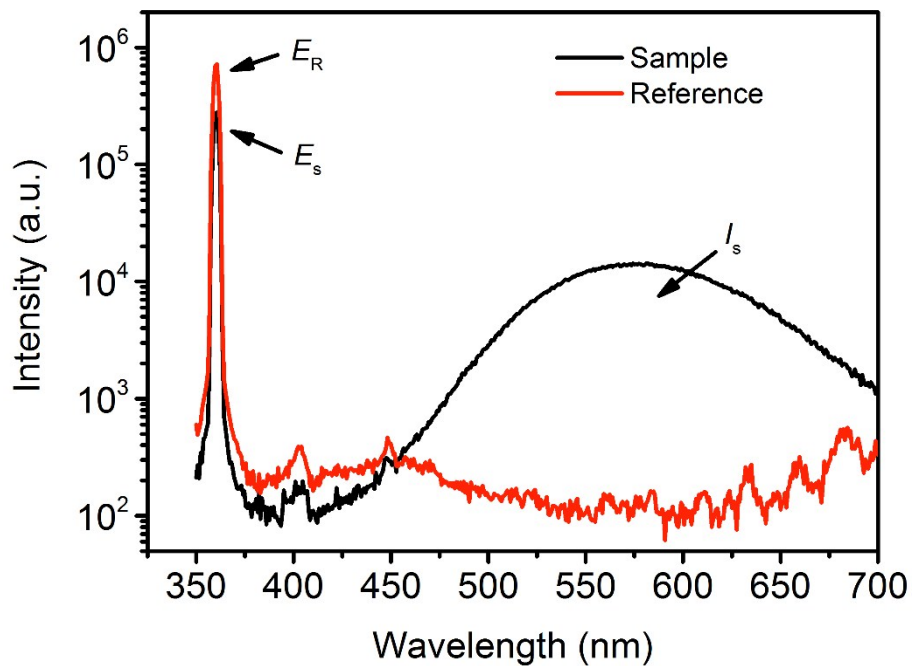

**Figure S5.** Excitation line of reference and emission spectrum of  $(C_4N_2H_{14}Br)_4SnBr_6$  collected by an integrating sphere. The PLQE was calculated by the equation:

$$\eta_{QE} = I_s / (E_R - E_S)$$

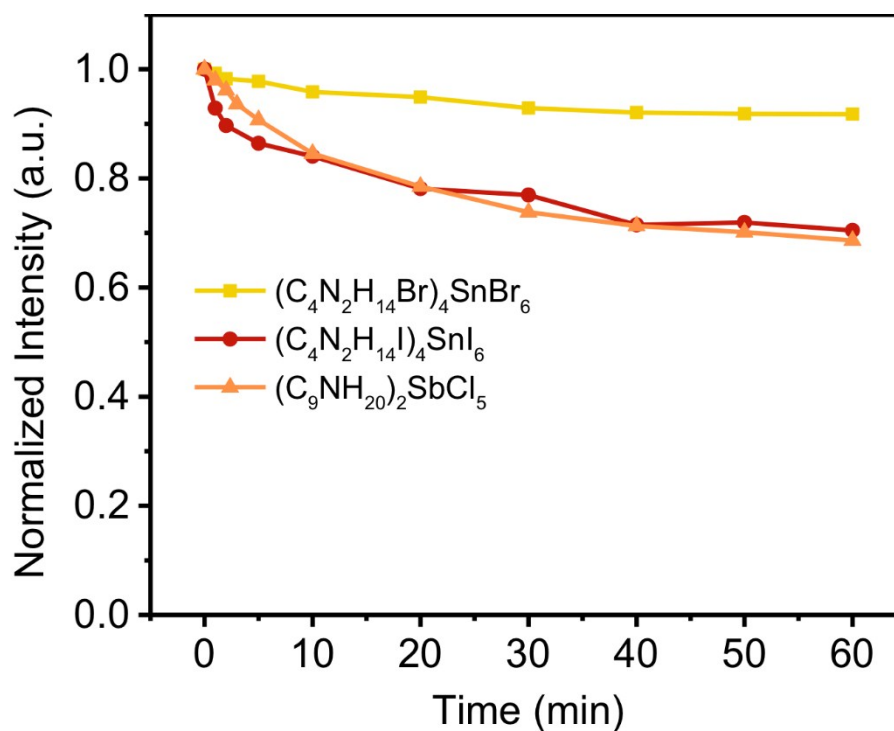

**Figure S6.** Photostability of 0D organic metal halide hybrids under continuous illumination using a high-power mercury lamp ( $150 \text{ mW/cm}^2$ ).

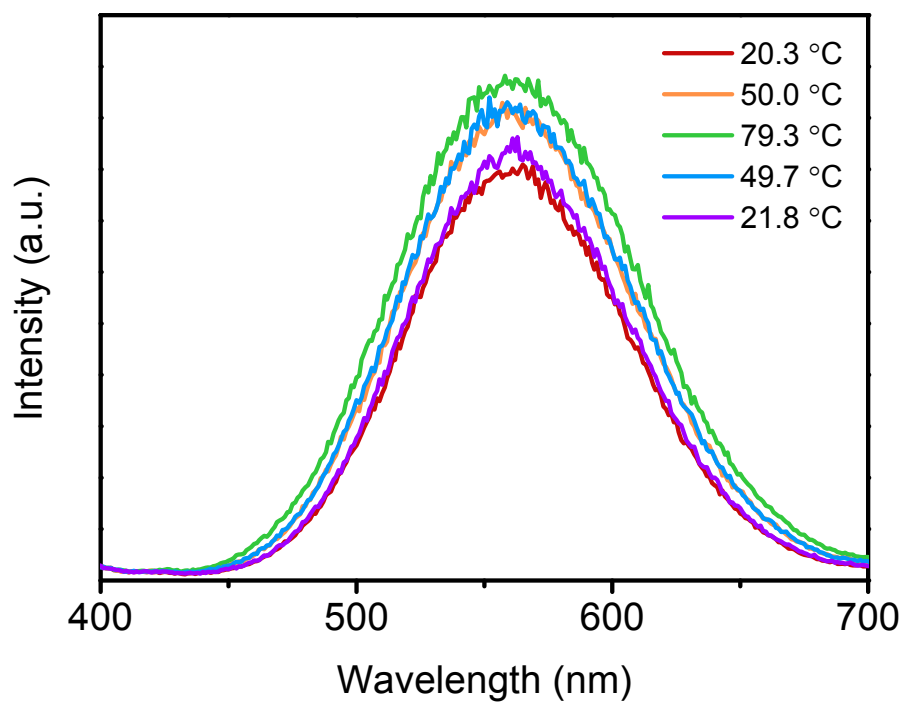

**Figure S7.** Temperature dependent photoluminescence of  $(C_4N_2H_{14}Br)_4SnBr_6$ .

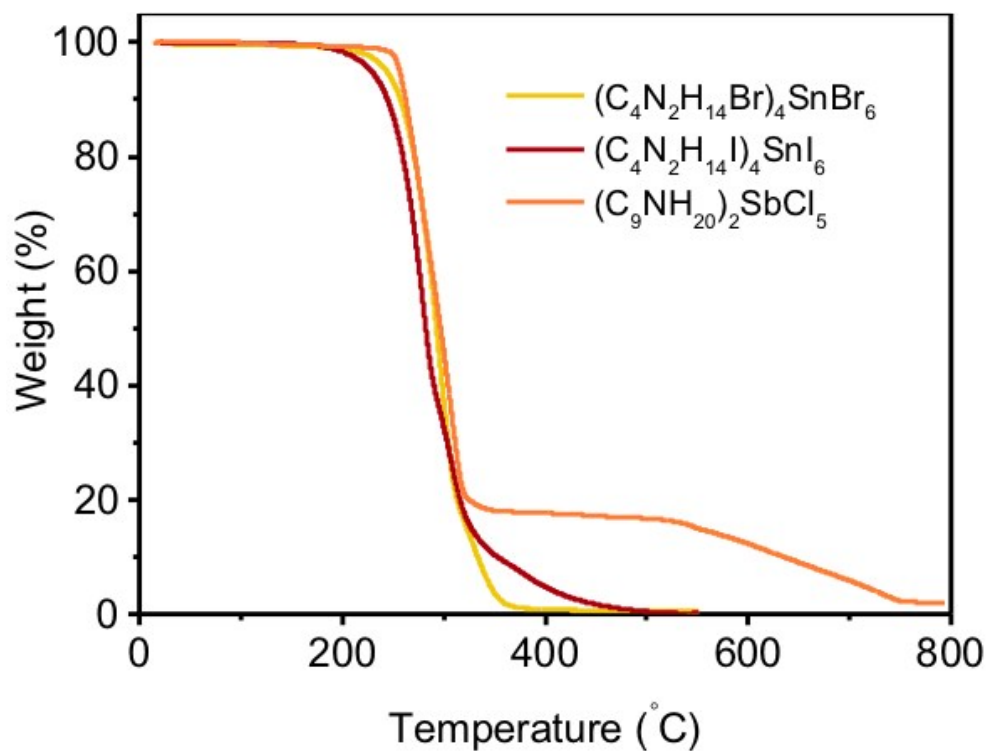

**Figure S8.** TGA of Sn based 0D organic metal halide hybrids.

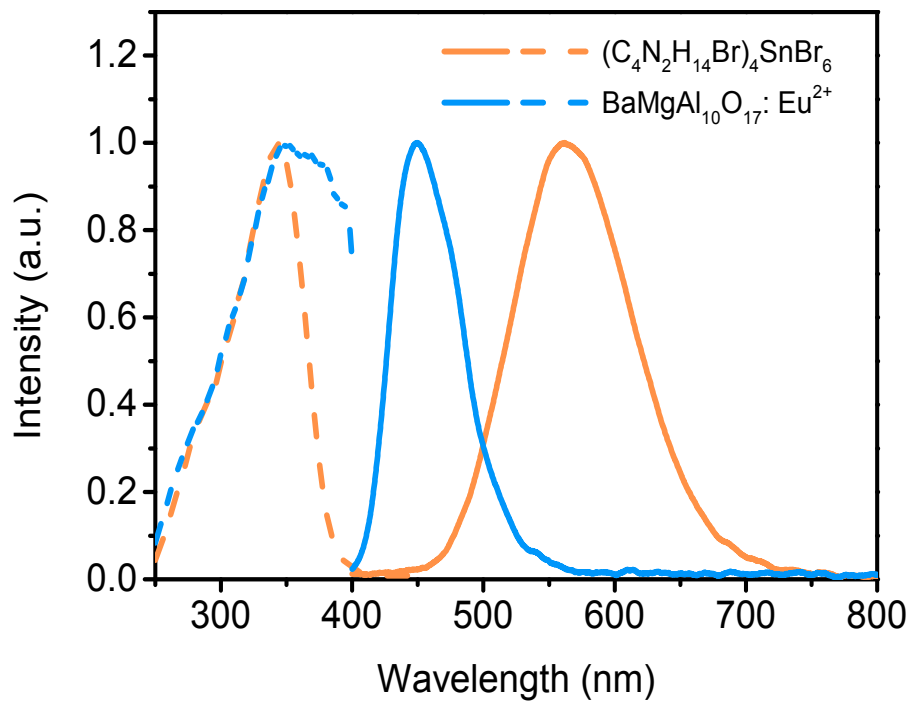

**Figure S9.** The normalized excitation (dash lines) and emission (solid lines) spectra of  $\text{BaMgAl}_{10}\text{O}_{17}:\text{Eu}^{2+}$  and  $(\text{C}_4\text{N}_2\text{H}_{14}\text{Br})_4\text{SnBr}_6$  phosphors.

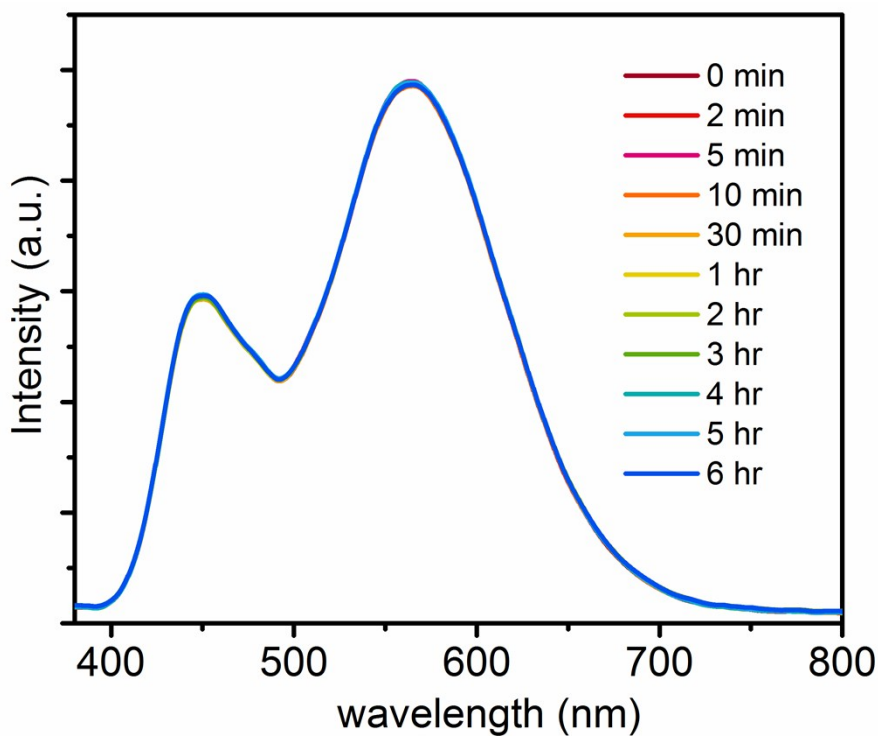

**Figure S10.** Emission spectra of a white LED continuously operated in air for more than six hours with a brightness of  $\sim 400 \text{ cd/m}^2$ .
